# Supplementary material for: Influence of Subcellular Localization and Functional State on Protein Turnover
Source: MDPI journal article supplement (doi:10.3390/cells10071747), 2021-07-10
Supplement: s1 [file s1]

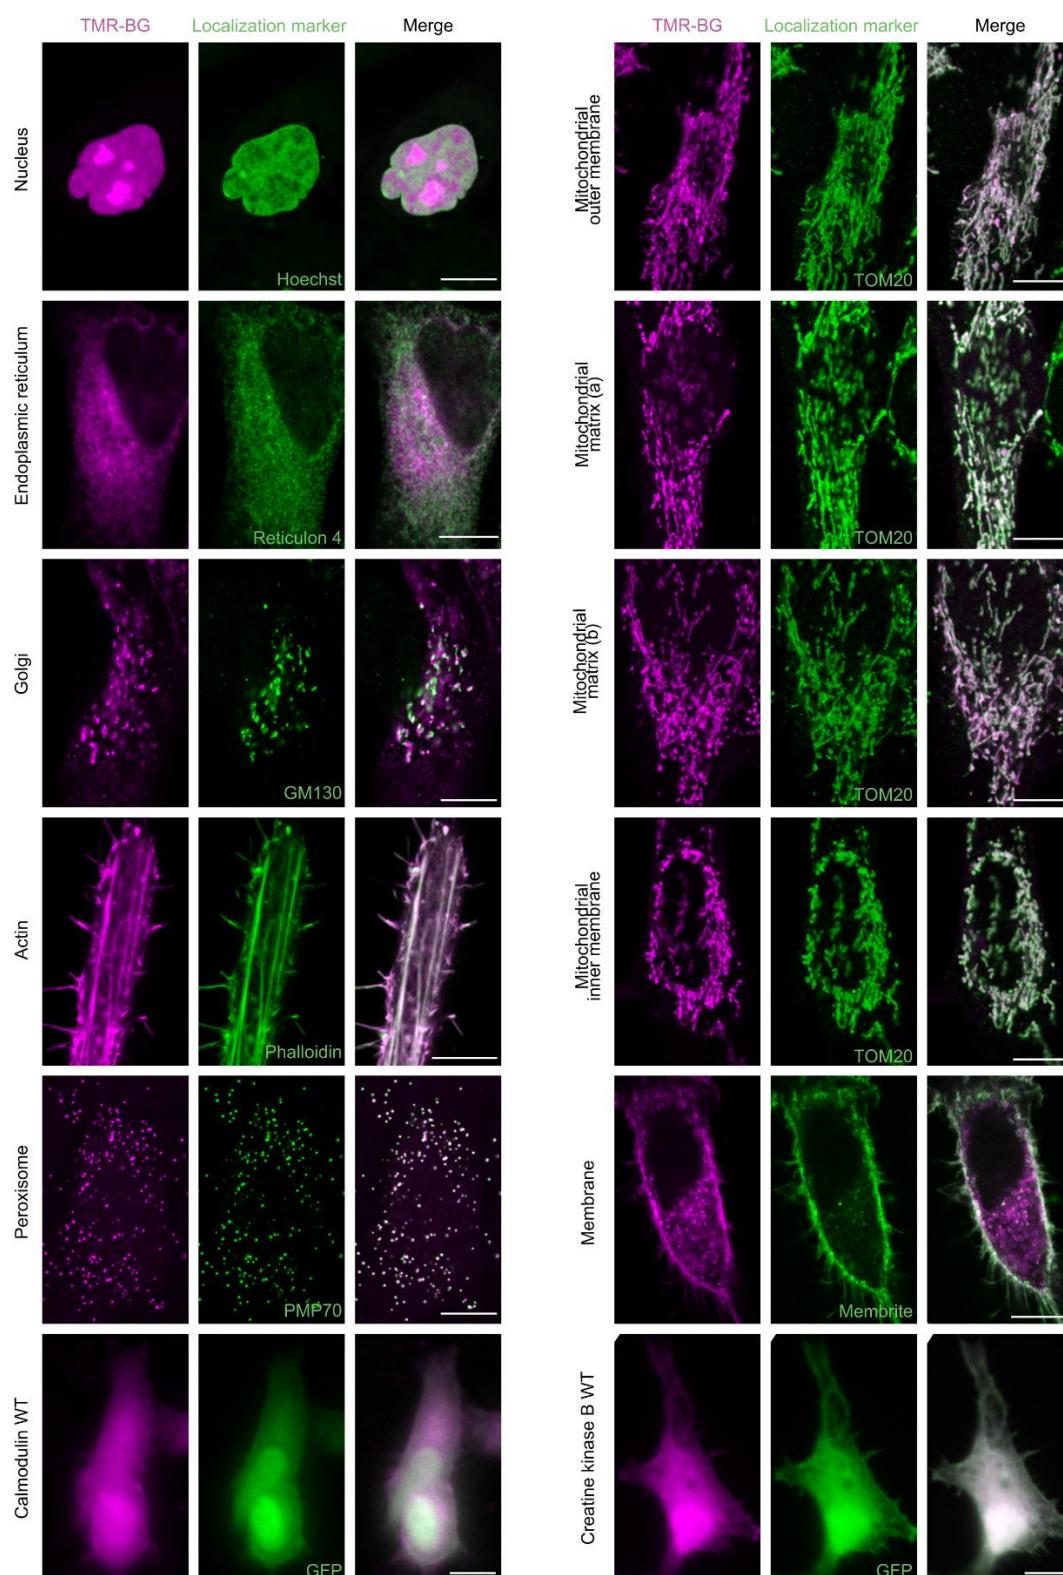

**Supplementary Figure 1.** Localization of SNAP-tag fusion constructs. The panels show the different SNAP sensors (summarized in Table 1), labelled with TMR-BG (magenta) and the respective colocalization marker (green). Note that NLS in cells is known to be enriched in nucleoli [87], while Hoechst, especially in human cells, is more evenly distributed. Along similar lines, Membrane labelling is a more reliable marker of the plasma membrane, while the palmitoylated-

SNAP sensor is present both on plasma membrane as well as on other membranes within cells, as also previously observed for palmitoylated proteins [88]. Calmodulin WT and Creatine kinase B WT expressing cells were co-transfected with GFP, which is soluble and serves here as a control for soluble protein localization (reproduced from Figure 1). For the localization of the Rab5 sensors, please refer to main Figure 5. Scale bars 10  $\mu$ m.

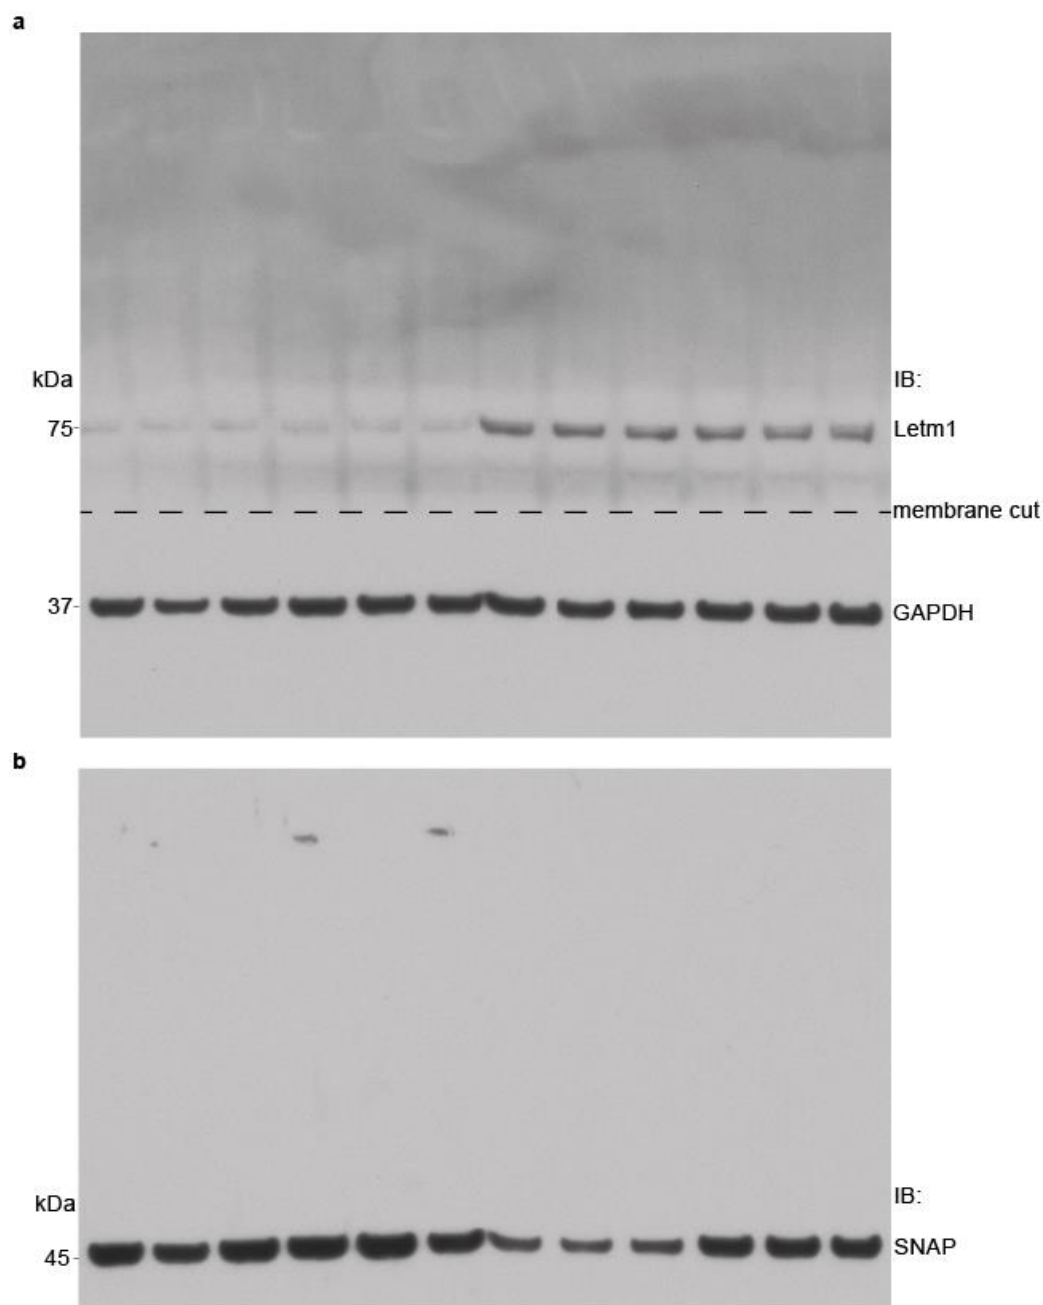

**Supplementary Figure 2.** Western blot to study Rab5a-WT and Rab5a-Q79L association with the membrane. **a.** Immunoblot for Letm1 (75 kDa) and GAPDH (37 kDa). The position where the membrane was cut (but exposed on the same film) is indicated by a dashed line. **b.** Immunoblot for SNAP-tag (45 kDa).

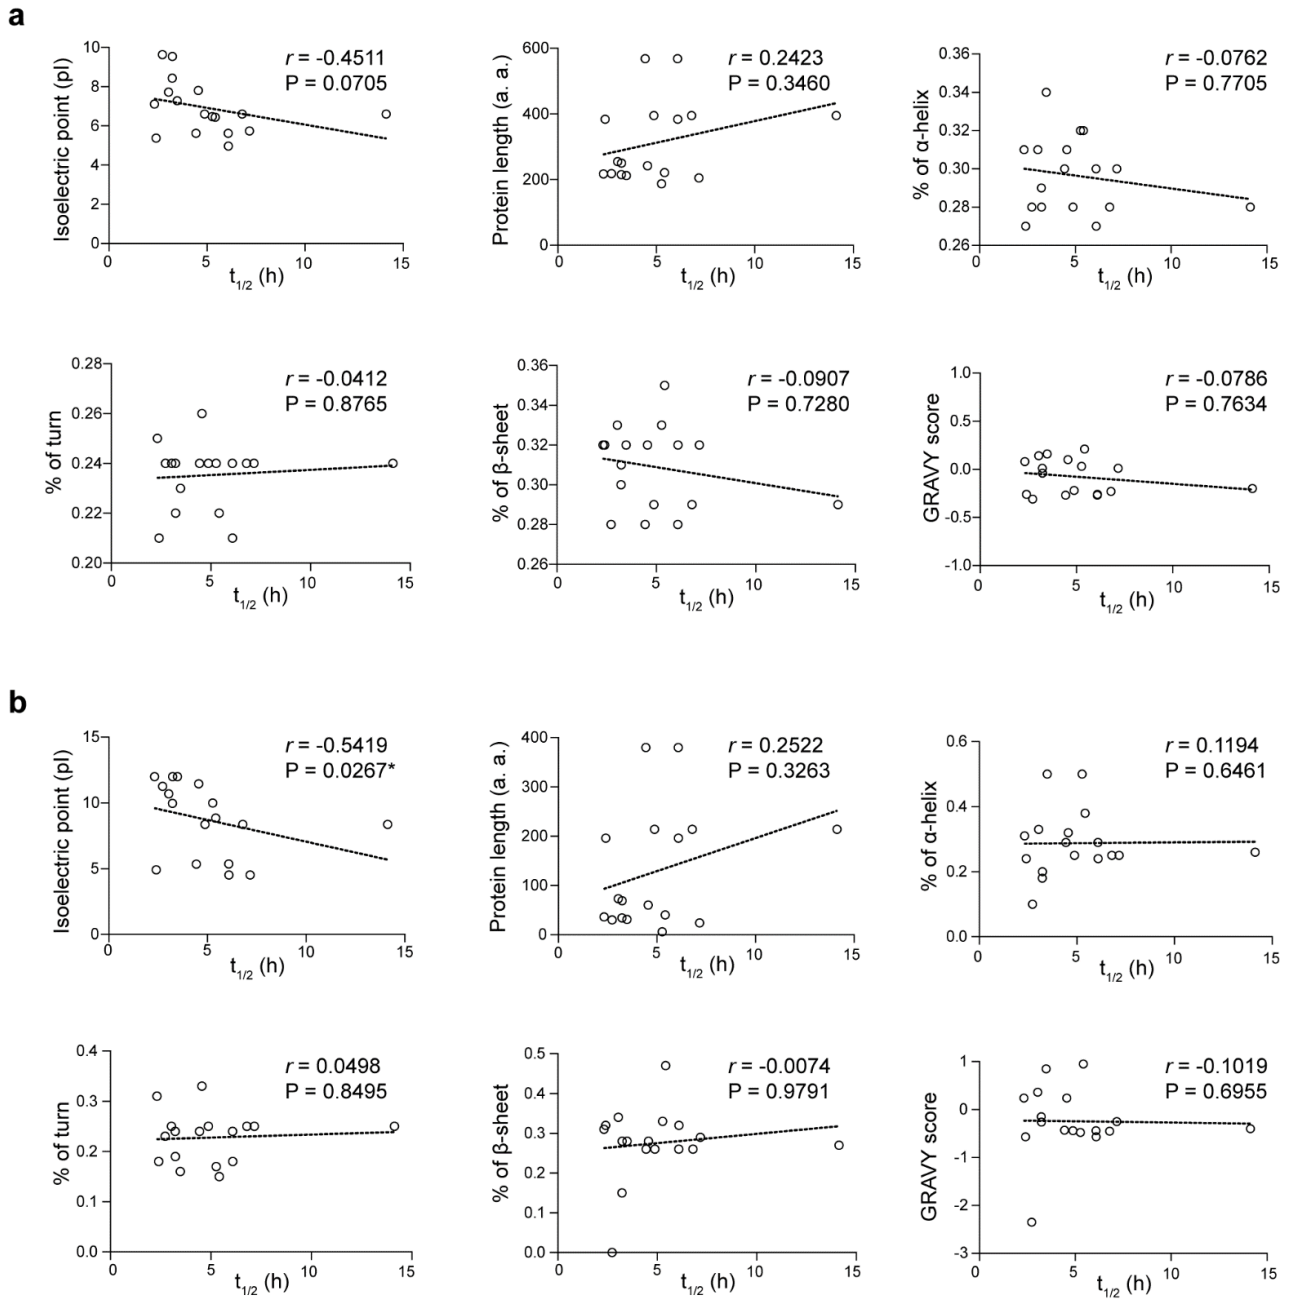

**Supplementary Figure 3.** Correlations of protein half-lives with biochemical properties including (a) or excluding (b) SNAP-tag. a-b. Correlations between protein half-lives with various characteristics of proteins considering (a) or not considering (b) the SNAP-tag sequence in the calculation. These measures include the isoelectric point, the protein length, the percentage of alpha-helix, turn or beta-sheet and grand average of hydropathy (GRAVY), a measure of hydrophobicity. See methods for details. All the data are presented as scatter plots with linear fits represented by a segmented line.  $r$  – Spearman's rank correlation coefficient ( $N = 17$ , data does not follow Gaussian distribution).

17  
18  
19  
20  
21  
22  
23
